# Supplementary material
Source: PubMed Central journal article supplement (PMC9326786)
Supplement: NIHMS1823947-supplement-Supplemental_Material.pdf [file NIHMS1823947-supplement-Supplemental_Material.pdf]

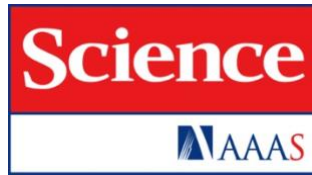

## Supplementary Materials for

TCR-V $\gamma\delta$  usage distinguishes pro-tumor from anti-tumor intestinal  $\gamma\delta$  T cell subsets

Bernardo S. Reis\*, Patrick W. Darcy, Iasha Z. Khan, Christine S. Moon, Adam E. Kornberg, Vanessa S. Schneider, Yelina Alvarez, Olawale Eleso, Caixia Zhu, Marina Scherthanner, Ainsley Lockhart, Aubrey Reed, Juliana Bortolatto, Tiago B. R. Castro, Angelina M. Bilate, Sergei Grivennikov, Arnold S. Han, Daniel Mucida\*

\* correspondence to: [breis@rockefeller.edu](mailto:breis@rockefeller.edu) and [mucida@rockefeller.edu](mailto:mucida@rockefeller.edu)

### **This PDF file includes:**

Materials and Methods  
Captions for Movies S1 and S2  
Table S1 to S4  
Figs. S1 to S10

### **Other Supplementary Materials for this manuscript includes the following:**

Movies S1 and S2  
Data S1 to S3

## Material and Methods

**Human Specimens.** Tumors and adjacent normal colon tissues were collected with informed consent from the patients diagnosed with colorectal adenocarcinoma at Columbia University Irving Medical Center, as approved by the Columbia University Institutional Review Board (IRB) (AAAR1384) and Rockefeller University IRB (YAL1027). All protocols were performed in accordance with the guidelines provided by the IRB. All patients were treatment naïve at the time of sample acquisition.

**Biopsy Sample Processing.** Fresh tissue was collected the same day of the surgery and the tissue was dissociated into single-cell suspensions with enzymatic digestions using gentleMACS dissociator per manufacturer's protocol (Miltenyi Biotec). Single cell suspensions were cryopreserved (40% FBS 10% DMSO) and stored in liquid nitrogen.

**Mice.** C57BL/6J control (000664), *Trdc*<sup>GFP</sup> (016941), *Trdc*<sup>-/-</sup> (002120), *Trdc*<sup>CreER</sup> (031679), *Scl2a1*<sup>fl/fl</sup> (031871), *Rorc*<sup>fl/fl</sup> (008771), *Cdx2*<sup>CreER</sup> (022390), Rosa26<sup>dTomato</sup> (007914) were purchased from Jackson Laboratories and kept in our facility. *APC*<sup>fl/fl</sup> mice were provided by S. Grivennikov (C. Sinai) (14, 23, 24). E8I<sup>CRE</sup> mice were provided by Ichiro Taniuchi (RIKEN, Japan). *Vγ4*<sup>-/-</sup>, *Vγ6*<sup>-/-</sup> and *Vγ7*<sup>-/-</sup> mice were developed by mutating *Trgv4*, *Trgv6*, and *Trgv7* genes, respectively, using CRISPR/Cas9 genome editing as described below. CRISPR mutant mice were backcrossed at least 5 times to B6 mice prior to use in experiments. Heterozygous or wild-type homozygous littermates were used as controls as indicated in figure legends. Mice were bred within our facility to obtain strains described and were 7-12 weeks of age for all experiments. To minimize microbiome fluctuations in the AOM-DSS model, genetically modified and wild-type control animals were co-housed from birth. Male and female mice were used in all other experiments, in similar distribution, unless otherwise stated in the figure legends. Estrous cycle was not controlled for in female mice. Animal care and experimentation were consistent with NIH guidelines and

approved by the Institutional Animal Care and Use Committee (IACUC) at The Rockefeller University. All animals were kept in specific pathogen free (SPF) conditions.

**Generation of  $V\gamma$  specific knockout by CRISPR-Cas9 gene editing.** For the generation of specific  $V\gamma$  knockout animals, gRNA targeting specific TRVG genes were designed and synthesized as sgRNA by IDT. sgRNA and Cas9 protein were injected in the pronucleus of 1-cell-stage fertilized C57BL/6 embryos. Injected embryos were implanted into pseudo-pregnant foster Swiss animals and mutant offspring were selected by specific PCR genotyping (**Table S2**) and Sanger DNA sequencing. Mutants were backcrossed to C57BL/6 animals for at least 5 generations (as indicated in figure legends). For TRVG4 gene targeting, sgRNA sequence GUGUAACCAUACACUGGUACCGG was used. For TRVG6 gene targeting, sgRNA AGCCCGAUGCAUACAUACACUGG and for TRVG7 gene targeting sgRNA sequence ACUGGUACCGAUUCCAGAAAGGG was used. sgRNA and Cas9 protein were purchased from Integrated DNA Technologies (IDT). Guides with a MIT score higher than 89 were picked on UCSC Genome Browser. Animals were kept in our facility under the Rockefeller University IACUC protocol.

### **Colorectal cancer (CRC) models**

**AOM-DSS model.** Mice were injected with 12.5mg/kg of Azoxymethane (AOM) 1 day prior to 3 consecutive oral exposures of dextran sodium sulfate (DSS, 2% in drinking water) for 1 week with 2 weeks interval between exposures. Animals were sacrificed 12 weeks after initial AOM injection. Tumors were counted and measured at the time of experiment termination.

**APC model.**  $Cdx2^{CreER};APC^{fl/fl}$  ( $iCdx2^{AAPC}$ ) mice were injected twice with 0.8 mg of tamoxifen (Sigma) 4mg/ml in corn oil (Sigma), two days apart. Four weeks after the first injection, mice were sacrificed, and tumors were measured and counted. Animals were monitored for weight loss and sickness behavior and the experiment was terminated when weight loss was greater than 20% of initial weight.

**Tamoxifen treatment regimen in AOM-DSS model.** Tamoxifen (Sigma) was administered by intraperitoneal injections, twice a week, of 0.8mg of tamoxifen diluted 4 mg/mL in corn oil (Sigma). For early gene depletion, tamoxifen injections started 1 week before AOM administration and continued until week 3 of AOM-DSS CRC model. For late gene targeting, tamoxifen injections started 1 week after second round of DSS and continued until the week 12 of the AOM-DSS CRC model.

**Antibiotic and EdU administration.** *iCdx2<sup>AAPC</sup>* mice were treated for one week with broad spectrum antibiotics consisting of 1mg/ml ampicillin, 1mg/ml neomycin, 0.5mg/ml vancomycin, 0.5mg/ml metronidazole and 10g/ml sucralose in the drinking water during the final week of the experiment. EdU was also added to the antibiotic containing water at 1mg/ml. As a control, 10mg/ml sucralose solution containing 1mg/ml EdU was used. EdU detection was performed using the Click-iT™ Plus EdU Flow Cytometry Assay kit (Thermo Fisher Scientific, C10632), according to manufacturer's instructions.

**In vivo antibody administration.** For depletion of V $\gamma$ 1<sup>+</sup> T cells, 200 $\mu$ g of anti-V $\gamma$ 1 antibody 2.11 (Bio X-Cell) was injected intraperitoneally twice a week 1 week before and for the first 2 weeks of AOM-DSS model. For depletion of V $\gamma$ 4<sup>+</sup> T cells, 200 $\mu$ g of anti-V $\gamma$ 4 antibody UC3-10A6 (Bio X-Cell) was injected intraperitoneally twice a week for the final 6 weeks of AOM-DSS model. For TCR $\gamma\delta$  blockage, 400 $\mu$ g of anti-TCR $\gamma\delta$  antibody UC7-13D5 (Bio X-Cell) was injected intraperitoneally twice a week at indicated periods of APC loss model.

**Isolation of intestinal and tumor infiltrating cells.** Intraepithelial lymphocytes were isolated as previously described (46). Briefly, large intestines were harvested and washed in PBS and 1mM dithiothreitol (DTT) followed by 30 mM EDTA. Intraepithelial cells were recovered from the supernatant of DTT and EDTA washes. Tumor infiltrating cells were obtained after collagenase digestion of the tissue. Dissected tumor was minced and incubated with 50mg/ml of collagenase VIII, 200mg/ml of DNase in RPMI for 30 minutes. Mononuclear cells were isolated by gradient centrifugation using Percoll. Single-cell

suspensions were then stained with fluorescently labeled antibodies for 25min at 4°C prior to flow cytometry analysis and/or cell sorting.

**Flow cytometry.** Cells were stained for anti-CD45 (BD 561487 clone 30-F11), anti-TCR $\beta$  (BioLegend 109220 clone H57-597) anti-TCR $\gamma\delta$  (eBioscience 11-5711-85 clone GL-3), anti-CD8 $\alpha$ , (eBioscience 56-0081-82 clone 53-6.7), anti-CD4 (BioLegend 100552 clone RM4-5), anti-PD-1 (BioLegend 135219 clone 29F.1A12), anti-V $\gamma$ 1 (BioLegend 141109 clone 2.11), anti-V $\gamma$ 4 (eBioscience 25-5828-82 clone UC3-10A6), anti-V $\gamma$ 6 (clone 17D1, kindly donated by Yasmin Belkaid, Ph.D.), anti-V $\gamma$ 7 (clone GL1.7, kindly donated by Rebecca O'Brien, Ph.D.), anti-CD107 (eBioscience 46-1071-82 clone 1D4B), anti-IFN- $\gamma$  (eBioscience 45-7311-82 clone XMG1.2), anti-IL-17 (BD 559502 clone TC11-18H10), anti-CD11b (eBioscience 47-0112-82 clone M1/70). For anti-V $\gamma$ 6 staining, cells were first stained with anti-TCR $\gamma\delta$  (clone GL-3) for 30 minutes prior anti-V $\gamma$ 6 17D1 antibody staining. For cytokine profiling, tissue isolated cells were stimulated ex-vivo with 1mg/ml of phorbol myristate acetate (PMA) and 1mg/ml of Ionomycin in the presence of 10mg/ml of Brefeldin for 4 hours prior staining.

**Single-cell RNA sequencing.** Cryopreserved single cell suspensions of human colon biopsies were thawed at 37 C, washed with RPMI, and rested in complete RPMI in 96-well plate for 1 hour. The cells were subsequently incubated with PMA/Ionomycin for 3 hours, washed, blocked in Fc receptor block (TruStain FcX, Biolegend), and tagged with cell hashing antibody. Conjugation of purified antibodies for cell hashing was performed as described by the Technology Innovation Lab at the New York Genome Center (<https://cite-seq.com/protocol/>). The list of antibodies, clones, and barcodes are available in **Table S3**. The hashtagged samples were then pooled and stained for FACS sorting with anti-CD3 (clone OKT3, BioLegend) APC, anti-TCR $\gamma\delta$  (clone 5A6.E9, Thermo Fisher) PE, and anti-TCR $\alpha\beta$  (clone IP26, BioLegend) Alexa Fluor 488. Samples were subsequently stained with Sytox Blue (Thermo Fisher) prior to acquisition to determine cell viability. Viable T cells were sorted in FACS Aria II by gating SytoxBlue<sup>-</sup>

CD3<sup>+</sup>TCR $\gamma$  $\delta$ <sup>+</sup>TCR $\alpha$  $\beta$ <sup>-</sup> cells and subsequently transferred into RPMI with 10% FBS at 4C. FACS-sorted CD3<sup>+</sup> TCR $\gamma$  $\delta$ <sup>+</sup> cells were loaded onto the Chromium 10x Genomics v1.1 platform (10X Genomics) as described in the manufacturer's protocol. Single cell 5' transcript and TCR $\gamma$  $\delta$  libraries were prepared using Chromium Next GEM Single Cell V(D)J Reagent Kits v1.1 with Feature Barcode Technology for Cell Surface Protein (CG000228). Following cDNA amplification, cell hashing additive oligos were added to amplify cell hashtag oligos. The products were separated using SPRIselect Beads (Beckman Coulter). Cell hashtag library generation was performed as described by the Technology Innovation Lab at the New York Genome Center (<https://cite-seq.com/protocol/>). TCR $\gamma$  $\delta$  libraries were prepared as described in Mimitou *et al.*, 2019. cDNA libraries were quantified using Agilent High Sensitivity D5000 ScreenTape (Agilent, no. 5067-5592). Libraries were sequenced using NovaSeq 6000 platform.

**Data Processing of Single-Cell RNA-Seq and Single Cell TCR-Seq Libraries.** Raw fastq files derived from our RNA-seq libraries were processed with cellranger count (v6.0.2) using the 10x Genomics prebuilt human reference (GRCh38 - GENCODE v32/Ensembl 98). The count matrix was processed using Seurat (v4.0.4) (47). Quality control was performed by removing cells with high (> 10%) mitochondrial-derived UMIs. The assembly, alignment, and annotation of TCR sequences were performed using the Cellranger vdj workflow from 10x Genomics and the prebuild human vdj reference (GRCh38 - Ensembl5.0.0). The assignment of gamma/delta T-cell clones was performed using the clonality package (<https://github.com/victoraLab/clonality>). Paired TCR clones were defined by identical V, (D), J genes, and CDR3 length and nucleotide sequence for delta and gamma chains. Cells with only one successfully TRG or TRD chain sequenced were assigned as part of a paired TCR core if its DNA sequence matched its correspondent chain completely (sticky parameter).

**Single Cell RNA-Seq Normalization and Statistical Analysis.** The raw UMI counts were normalized using the SCTransform function available in the Seurat (v4.0.4) package (48). The top 3000 variable genes were first used for dimensional reduction by PCA using the scaled data. The first 30 principal components

were further used for visualization using the Manifold Approximation and Projection (UMAP) and cell clustering (47, 48). The Wilcoxon rank-sum test detected differentially expressed genes by comparing each cluster against all cells. Genes with adjusted p-values of 0.05 or less were considered for downstream analysis. Finally, we scored each cell based on gene sets for the S and G2M phases using the CellCycleScoring function within the Seurat package (49). Cells that did not score in at least one set were marked as in the G1 phase. GSEA analyses were performed using the fgsea package for R (50) and the Molecular Signatures Database (MSigDB - v7.5.1)[PMID: 16199517]. In short, for each condition or cluster, genes were ranked using their Log2FoldChanges, and enriched pathways were considered significant when having adjusted p-values of 0.05 or less. Heatmap was constructed using the ComplexHeatmap package (51) with the Pearson residuals matrix obtained by GetResidual function from Seurat.

**Generation of Circos Plots and Alluvial Diagrams.** TCR sharing (clonal overlap) was visualized using Circos to create circular plots aesthetics (52). Each ideogram denotes a cell population as indicated in the figures, with bands representing clonal distribution. Alluvial diagrams were generated with the ggalluvial package for R (53).

**Bulk mRNA-Seq Library Preparation.** Sorted cells (300-800 cells) were lysed in a guanidine thiocyanate buffer (TCL buffer, QIAGEN) supplemented with 1%  $\beta$ -mercaptoethanol. RNA was isolated by solid-phase reversible immobilization bead cleanup using RNAClean XP beads (Agentcourt, A63987), reverse transcribed, and amplified as described (54). Uniquely barcoded libraries were prepared using Nextera XT kit (Illumina) following manufacturer's instructions. Sequencing was performed on an Illumina NextSeq500.

**Bulk RNA-Seq Analysis.** Raw fastq files were aligned and quantified with STAR (v. 2.7.10a) by using the mouse genome (mm39) and the mouse transcriptome (gencode M29) (55). Next, the count matrix was

imported to the R environment and processed by the DESeq2 package (v. 1.34) pipeline (56). Briefly, genes from samples expressing less than ten reads were pre-filtered. Gene expression among samples was normalized by applying a negative binomial distribution model. The Wald test was employed to determine differential gene expression between conditions. Genes containing adjusted p-values (FDR) less than 0.1 were considered for downstream analysis, and log<sub>2</sub> fold changes were shrunk using the ash algorithm (57).

**Single-Cell TCR Sequencing.** Single cells were index-sorted using a FACS Aria into 96-well plates containing 5  $\mu$ L of lysis buffer (TCL buffer, QIAGEN 1031576) supplemented with 1%  $\beta$ -mercaptoethanol and frozen in  $-80^{\circ}\text{C}$  prior to RT-PCR. RNA and RT-PCRs for TCR $\gamma$  and TCR $\delta$  were prepared using specific primers (Table S4). PCR products for TCR $\gamma$  and TCR $\delta$  were multiplexed with barcodes and submitted for MiSeq sequencing (58) using True Seq Nano kit (Illumina). Fastq files were de-multiplexed and paired-end reads were assembled at their overlapping region using PANDASEQ (59) and FASTAX toolkit. De-multiplexed and collapsed reads were assigned to wells according to barcodes. Fasta files were aligned and analyzed on IMGT (<http://imgt.org/HighV-QUEST>) (60). Cells with identical TCR $\gamma$  and TCR $\delta$  CDR3 amino acid sequences were considered as the same clones. Clonality was assigned based on paired TCR $\gamma\delta$  per mouse. Only in frame junction sequences of TCR $\gamma\delta$  were included in the analysis.

**FocusClear and cell localization on villus-crypt axis.** Tissue clearing was performed according to FocusClear manufacturer's (Celexplorer Labs. Co.) instructions. Briefly, E8<sub>I</sub> (*Cd8a* enhancer I)<sup>Cre</sup>:*Rosa26*<sup>fsf-dTomato</sup> (E8<sub>I</sub><sup>dTomato</sup>):*Trdc*<sup>GFP</sup> double-reporter mice were injected with Hoechst dye (blue) for visualization of epithelial cell nuclei. After 15-30 min, mice were sacrificed by cervical dislocation and segments of the small intestine were removed, washed (intact) and fixed in 4% PFA at gentle agitation for 2h at RT. After fixation, samples were washed in DPBS and placed in FocusClear solution for approximately 15 min. at room temperature. Once visual confirmation of clearance was obtained, samples were mounted in 3D printed slides with MountClear, sealed and imaged using an inverted LSM 880 NLO



laser scanning confocal and multiphoton microscope (Zeiss). As this protocol maintains native GFP and dTomato, and introduced Hoechst fluorescence, no antibody staining was necessary. Cell X and Y coordinates were obtained using *Imaris* (Bitplane AG) software, as described before (3). Multiple technical replicates per sample (segment) were obtained.

**Intravital imaging.** Tamoxifen-treated  $iCdx2\Delta^{APC}\text{-}Trdc^{GFP}$  reporter mice were anesthetized by continuous administration 1% of isoflurane and 1L per minute of oxygen mixture while imaging was performed. Mice were injected with Hoechst dye (blue) for visualization of epithelial cell nuclei. 10 min following induction of anesthesia, mice were placed on a custom platform heated to 37°C. Upon loss of recoil to paw compression, a small incision was made in the abdomen. The cecum and the proximal colon were located and placed onto a raised block of thermal paste covered with a wetted wipe paper. A coverslip was placed on top of the loop to immobilize the intestine. The platform was then transferred to the FV1000MPE Twin upright multiphoton system (Olympus) heated stage. Time-lapse was  $\pm$  30sec with a total acquisition time of 15 min. A complete Z stack (40 to 60  $\mu$ m) was made during each acquisition. *Imaris* (Bitplane AG) software was used for cell identification and tracking, using the “*Spots*” auto-regressive tracking algorithm as described by the manufacturer. The scoring of IEL behavior (speed) was entirely computational and unbiased.

**Statistical Analyses.** Statistical analyses were carried out using GraphPad Prism v.9. Flow cytometry analyses were carried out using FlowJo software. Data in graphs show mean  $\pm$  SEM and P values  $<$  0.05 were considered significant. Statistical analyses were performed using ordinary one-way ANOVA test with Bonferroni’s multiple comparison test and two-tail t-test, as indicated in the figure legends. \*P  $<$  0.05, \*\*P  $<$  0.01, \*\*\*P  $<$  0.001, \*\*\*\*P  $<$  0.0001. GraphPadPrism v.9 was used for graphs and statistical analysis, and Adobe Illustrator 2020 was used to assemble and edit figures.

**Movie S1.** *iCdx2<sup>ΔAPC</sup>* animals were i.p. injected twice with 0.8mg of Tamoxifen 2 days apart and subjected to intravital imaging of colonic  $\gamma\delta$  T cells at indicated time points. Two weeks pos Tamoxifen injection, animals were treated with 400 $\mu$ g of anti-TCR $\gamma\delta$  blocking antibody (UC7-13D5) three times a week and subjected to intravital imaging of colonic  $\gamma\delta$  T cells.

**Movie S2.** *iCdx2<sup>ΔAPC</sup>* animals were i.p. injected twice with 0.8mg of Tamoxifen 2 days apart and treated with 400 $\mu$ g of anti-TCR $\gamma\delta$  blocking antibody (UC7-13D5) three times a week. Animals were subjected to intravital imaging of cecal  $\gamma\delta$  T cells three weeks after initial Tamoxifen treatment.

**Data S1.** single-cell TCR sequencing analysis (scTCR-seq) of sorted  $\gamma\delta$  T cells from tumor and adjacent nontumor areas of *iCdx2<sup>ΔAPC</sup>* mice 4 weeks after tamoxifen injection.

**Data S2.** single-cell TCR sequencing analysis (scTCR-seq) of sorted  $\gamma\delta$  T cells from tumor and adjacent nontumor areas of wild type B6 mice subjected to AOM-DSS model.

**Data S2.** single-cell TCR sequencing analysis (scTCR-seq) of sorted  $\gamma\delta$  T cells from tumor and adjacent nontumor areas of  $V\gamma 4^{-/-}$  and littermate control mice subjected to AOM-DSS model.

**Table S1. CRC patient cohort.** Tumor information from accessed patients and expected  $\gamma\delta$  T cell numbers from non-tumor and tumor areas prior sorting.

Table S1

| ID  | Dem | Type             | Tumor Grade            | Location     | Tumor Invasion                                                                                                | Sample Info     | % $\gamma\delta$ cells/CD3+ | # $\gamma\delta$ cells/tube | # Tubes | Expected $\gamma\delta$ | Total cells  | Sorted |
|-----|-----|------------------|------------------------|--------------|---------------------------------------------------------------------------------------------------------------|-----------------|-----------------------------|-----------------------------|---------|-------------------------|--------------|--------|
| 337 | 60M | Microsatellite + | G2-3<br>Adenocarcinoma | Ascending    | muscularis propria into pericorectal tissue (T3)-pN1a                                                         | Normal<br>Tumor | 40%<br>10%                  | 790<br>170                  | 2<br>4  | 1580<br>680             | 10M<br>20M   | YES    |
| 859 | 74F |                  | G2<br>Adenocarcinoma   | Ascending    | Submucosa (T1)-pN0                                                                                            | Normal<br>Tumor | Not assessed<br>5%          | Not assessed<br>350         | 4<br>2  | Not assessed<br>700     | 40M<br>200K  | YES    |
| 989 | 59F |                  | G2<br>Adenocarcinoma   | Transverse   | Submucosa (T1)-pN0                                                                                            | Normal<br>Tumor | Not assessed<br>1%          | Not assessed<br>50          | 4<br>2  | Not assessed<br>100     | 24M<br>1.6M  | YES    |
| 1   | 75F | KRAS Q61H        | G2<br>Adenocarcinoma   | Sigmoid      | muscularis propria into pericorectal tissue (T3)-pN0                                                          | Normal<br>Tumor | 0<br>0                      | 0<br>0                      | 4<br>4  | 0<br>0                  | 20M<br>20M   | NO     |
| 391 | 48F | FBXW7 E471fs     | G2<br>Adenocarcinoma   | Rectosigmoid | visceral peritoneum (including tumor continuous with serosal surface through area of inflammation) (T4a)-pN1b | Normal<br>Tumor | 1%<br>1%                    | 70<br>100                   | 5<br>6  | 350<br>600              | 15M<br>30M   | YES    |
| 507 | 53F | FBXW7 S582L      | G2<br>Adenocarcinoma   | Sigmoid      | muscularis propria (T2)-pN1b                                                                                  | Normal<br>Tumor | Not assessed<br>1%          | Not assessed<br>10          | 3<br>2  | Not assessed<br>20      | 300K<br>1.4M | NO     |
| 633 | 79F |                  | G2-3<br>Adenocarcinoma | Sigmoid      | visceral peritoneum (including tumor continuous with serosal surface through area of inflammation) (T4a)-pN1c | Normal<br>Tumor | 1%<br>1%                    | 10<br>120                   | 1<br>3  | 10<br>360               | 4M<br>12M    | YES    |

**Table S2. Genotype primers for *Trgv*-specific knockout mice.**

Table S2

| <b>Geno</b> | <b>FWD-primer</b>       | <b>REV-primer</b>        | <b>Band size</b> |
|-------------|-------------------------|--------------------------|------------------|
| Vg4-WT      | TAGGAGTGTAACCATACACTGGT | AGATGCTGTGCTTTAGCCGT     | 223bp            |
| Vg4-Mut     | CCTGCCAGTCATTCATGGGT    | GGTTTCTGCCGATGAAAACCTTAC | 133bp            |
| Vg6-WT      | TACCAAGAGAAGCCAGGCCAG   | CCTAGGTGTCTGTGCAGGTG     | 266bp            |
| Vg6-Mut     | CAGAGGGAAGCAGTCTCACG    | TTGGAGACGCTGGCCTGGTA     | 113bp            |
| Vg7-WT      | ACTGGTACCGATTCCAGAAAG   | GAGGGCAAGGCTGAGTCATT     | 222bp            |
| Vg7-Mut     | AGCCATGCTGATGAGTTGCT    | CTCTGGGCCCAGTGGATGTAA    | 141bp            |

**Table S3. Hashtag antibodies used in sorted  $\gamma\delta$  T cells from CRC patients.**

Table S3

| Antibody                           | Clone | Manufacturer | Isotype              | Hash ID | Barcode      | Sample |
|------------------------------------|-------|--------------|----------------------|---------|--------------|--------|
| anti-human $\beta$ 2-microglobulin | 2M2   | BioLegend    | Mouse IgG1, $\kappa$ | hash1   | gaagatacacgt | 337N   |
| anti-human $\beta$ 2-microglobulin | 2M2   | BioLegend    | Mouse IgG1, $\kappa$ | hash2   | gtgagatatcac | 337T   |
| anti-human $\beta$ 2-microglobulin | 2M2   | BioLegend    | Mouse IgG1, $\kappa$ | hash3   | gaataacagccc | 859N   |
| anti-human $\beta$ 2-microglobulin | 2M2   | BioLegend    | Mouse IgG1, $\kappa$ | hash4   | caaagcgtatct | 859T   |
| anti-human $\beta$ 2-microglobulin | 2M2   | BioLegend    | Mouse IgG1, $\kappa$ | hash5   | gatgtggttaga | 989N   |
| anti-human $\beta$ 2-microglobulin | 2M2   | BioLegend    | Mouse IgG1, $\kappa$ | hash6   | agacgcggattg | 989T   |
| anti-human $\beta$ 2-microglobulin | 2M2   | BioLegend    | Mouse IgG1, $\kappa$ | hash7   | gacaggactttg | 391N   |
| anti-human $\beta$ 2-microglobulin | 2M2   | BioLegend    | Mouse IgG1, $\kappa$ | hash34  | tgctcaaaatgc | 391T   |
| anti-human $\beta$ 2-microglobulin | 2M2   | BioLegend    | Mouse IgG1, $\kappa$ | hash35  | gtctgtgacgta | 633N   |
| anti-human $\beta$ 2-microglobulin | 2M2   | BioLegend    | Mouse IgG1, $\kappa$ | hash36  | aggtcgacgaca | 633T   |



**Table S4. Primer list for TCR $\gamma$  and TCR $\delta$  amplification and sequencing.**

Table S4

| V segments          | Forward (1st PCR)                           | Constant              | Reverse (1st PCR)            |
|---------------------|---------------------------------------------|-----------------------|------------------------------|
| Vg1/2/3             | G CAGCTGGAGCAA CTGAA                        | TRGC1/2               | GGGAGTCCAGGATAGTATTGCC       |
| Vg4                 | GGAAGTTGGAGCAACCTGAA                        | TRGC4                 | GGGATTCCAGAATCTTTTCACCA      |
| Vg5                 | TCTCCTTTACCCGAAGACCA                        |                       |                              |
| Vg6                 | GAGGGAAGCAGTCTCACGTC                        |                       |                              |
| Vg7                 | ACCAAGCTAGAGGGGTCTCT                        |                       |                              |
| V segments          | Forward (2nd PCR)                           | Constant              | Reverse (2nd PCR)            |
| Vg1/2/3             | ATCGGTCAACCAGAGAGACAG                       | TRGC1/2               | GAAAATAGTGGGCTTGGGGGA        |
| Vg4                 | CCAAGAGATGAGACTGCACAA                       | TRGC4                 | CAGCAGCAGAAGGAAGGAAAAAT      |
| Vg5                 | CAAACAAGACGGTGCACATAA                       |                       |                              |
| Vg6/Vg7             | TACATMCACTGGTACCR A                         |                       |                              |
| adaptor 2nd PCR     |                                             | CCAGGGTTTTCCAGTCACGAC |                              |
| V segments          | Forward (3rd PCR)                           | Constant              | Reverse (3rd PCR) + barcodes |
| Vg1/2/3             | CCAGGGTTTTCCAGTCACGAC ATCGGTCAACCAGAGAGACAG | TRGC1/2               | CTTGGGGGAAATGTCTGCAT         |
| Vg4                 | CAGGGTTTTCCAGTCACGAC CCAAGAGATGAGACTGCACA   | TRGC4                 | GCTTGGGAGAAAAGTCTGAGT        |
| Vg5                 | CAGGGTTTTCCAGTCACGAC CAAACAAGACGGTGCACATAA  |                       |                              |
| Vg6/Vg7             | CCAGGGTTTTCCAGTCACGAC TACATMCACTGGTACCR A   |                       |                              |
| V segments          | Forward (1st PCR)                           | Constant              | Reverse (1st PCR)            |
| Vd1                 | GAAGTCACCATGAGCTGCAA                        |                       | AGCAGGGTCGAATCCACAAT         |
| Vd2-1/2-2           | ACCCTGGACTGCACCTATG                         |                       |                              |
| Vd4                 | CTGCCTCTTCTACTGCAC                          |                       |                              |
| Vd5                 | CGGCACTGAAGTAACACTGC                        |                       |                              |
| Vd6-1/6-2/6d-1/6d-2 | GGMGAAGAA STCACCCCTG                        | TRDC                  |                              |
| Vd7                 | AACGCAGAGCTGCAGTG TAA                       |                       |                              |
| Vd8                 | AGGAGAGACCCGAATTCTGA                        |                       |                              |
| Vd9                 | GTCAAGTGGCCCTCTCAGAA                        |                       |                              |
| Vd10                | ACCGTTCTGCTCTGAGATG                         |                       |                              |
| Vd11                | TGGAGAAGACAACGGTGACA                        |                       |                              |
| Vd12                | AAGGAGAAACGGTGCACTTG                        |                       |                              |
| V segments          | Forward (2nd PCR)                           | Constant              | Reverse (2nd PCR)            |
| Vd1                 | CTGGTATAGGCAGGGGGATGA                       |                       | ATGAA AACAGATGGTTTGCCG       |
| Vd2-1/2-2           | GGCAGGTGACTCTCGTCATT                        |                       |                              |
| Vd4                 | ACTGCACTGTAACAGGAGGG                        |                       |                              |
| Vd5                 | CAAAAGGCCAGACAGATCCT                        |                       |                              |
| Vd6-1/6-2/6d-1/6d-2 | CACCTGGACTGTTTCATATG                        | TRDC                  |                              |
| Vd7                 | TCGTCAAGCTGTTGTC CAAT                       |                       |                              |
| Vd8                 | TCCCCTCTCTGATATCCAT                         |                       |                              |
| Vd9                 | GCAGTATCCCGGAGAAGGTC                        |                       |                              |
| Vd10                | GGGCAGCCTCATCAATCTGT                        |                       |                              |
| Vd11                | CAAGCAAACAGCAAGTGGGG                        |                       |                              |
| Vd12                | AGGTTCTCTTCAGGGTCCA                         |                       |                              |
| adaptor 2nd PCR     |                                             | CCAGGGTTTTCCAGTCACGAC |                              |
| V segments          | Forward (2nd PCR)                           | Constant              | Reverse (3rd PCR) + Barcodes |
| Vd1                 | GGMGAAGAA STCACCCCTG CTGGTATAGGCAGGGGGATGA  |                       | AACAGATGGTTTGCCG GAG         |
| Vd2-1/2-2           | GGMGAAGAA STCACCCCTG GGCAGGTGACTCTCGTCATT   |                       |                              |
| Vd4                 | GGMGAAGAA STCACCCCTG ACTGCACTGTAACAGGAGGG   |                       |                              |
| Vd5                 | GGMGAAGAA STCACCCCTG CAAAAGGCCAGACAGATCCT   |                       |                              |
| Vd6-1/6-2/6d-1/6d-2 | GGMGAAGAA STCACCCCTG CACCTGGACTGTTTCATATG   | TRDC                  |                              |
| Vd7                 | GGMGAAGAA STCACCCCTG TCGTCAGCCTGTTGTC CAAT  |                       |                              |
| Vd8                 | GGMGAAGAA STCACCCCTG TCCCCTCTCTGATATCCAT    |                       |                              |
| Vd9                 | GGMGAAGAA STCACCCCTG GCAGTATCCCGGAGAAGGTC   |                       |                              |
| Vd10                | GGMGAAGAA STCACCCCTG GGGCAGCCTCATCAATCTGT   |                       |                              |
| Vd11                | GGMGAAGAA STCACCCCTG CAAGCAAACAGCAAGTGGGG   |                       |                              |
| Vd12                | GGMGAAGAA STCACCCCTG AGGTTCTCTTCAGGGTCCA    |                       |                              |

Figure S1

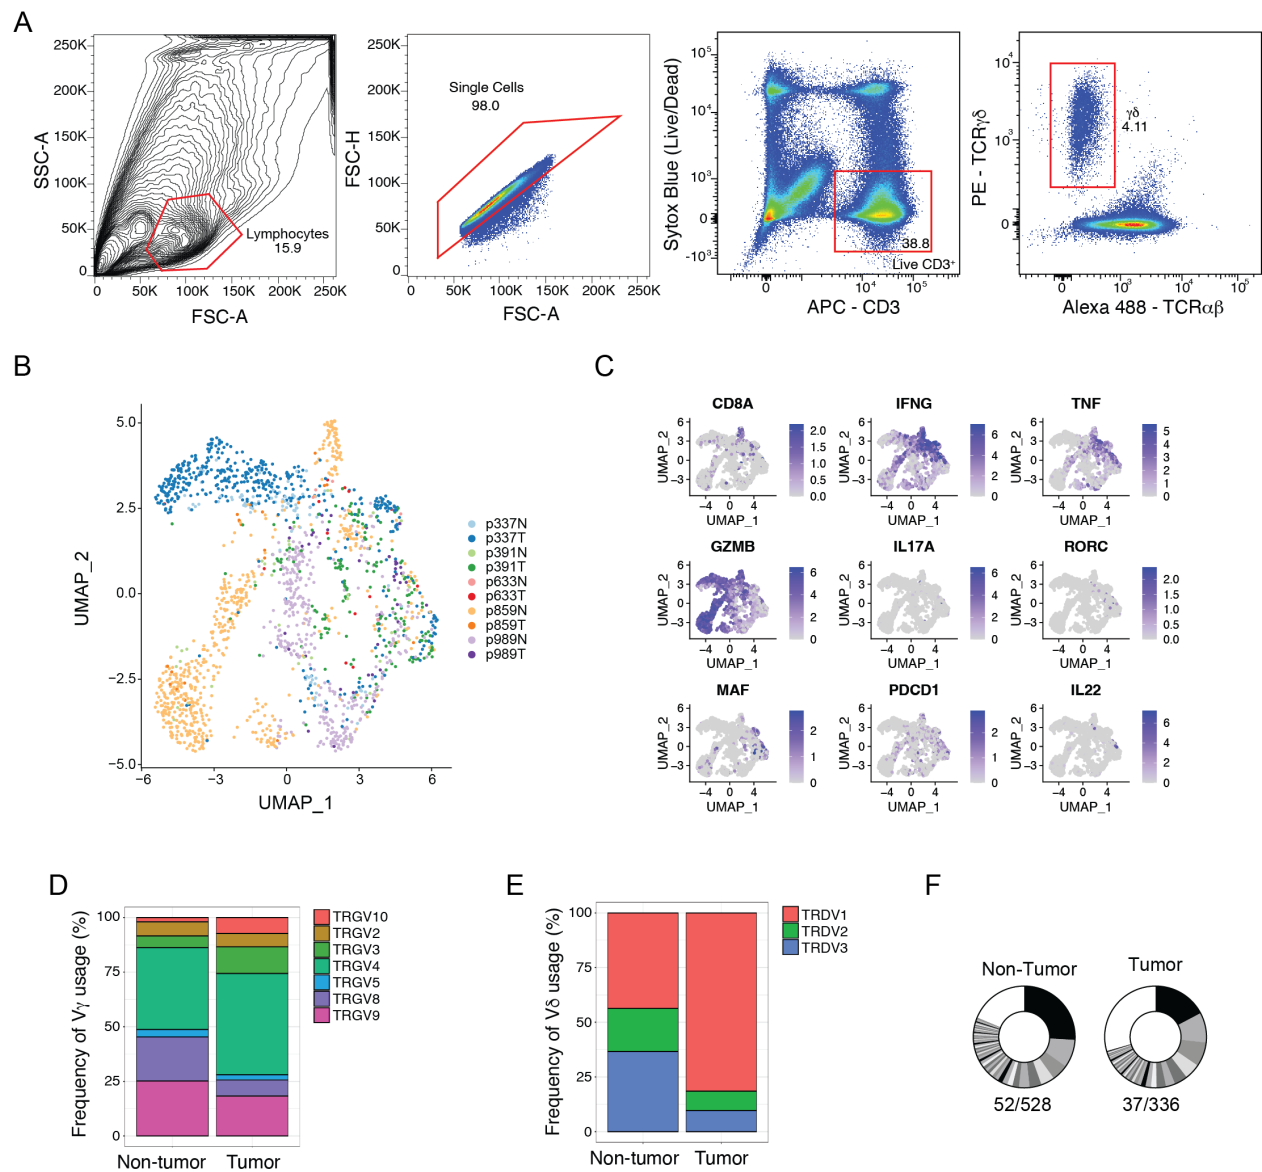

**Figure S1. Supporting data to Figure 1.** (A) Gate strategy used for sorting CD3<sup>+</sup>SytoxBlue<sup>-</sup>γδ<sup>+</sup> cells from both tumor and non-tumor areas of CRC patients for 10X Genomic RNA sequencing. (B) UMAP cluster of non-tumor (N) and tumor (T) isolated γδ T cells colored by patient ID. (C) UMAP cluster of non-tumor and tumor isolated γδ T cells showing specific gene expression. (D, E) Frequency of Vγ (D) and Vδ (E) usage by TCR sequenced γδ<sup>+</sup> T cells from tumor and non-tumor areas. (F) Pie chart showing γδ<sup>+</sup> T cell clonal expansion in tumor and non-tumor area. Number of expanded clones by the total number of clones sequenced are depicted.

Figure S2

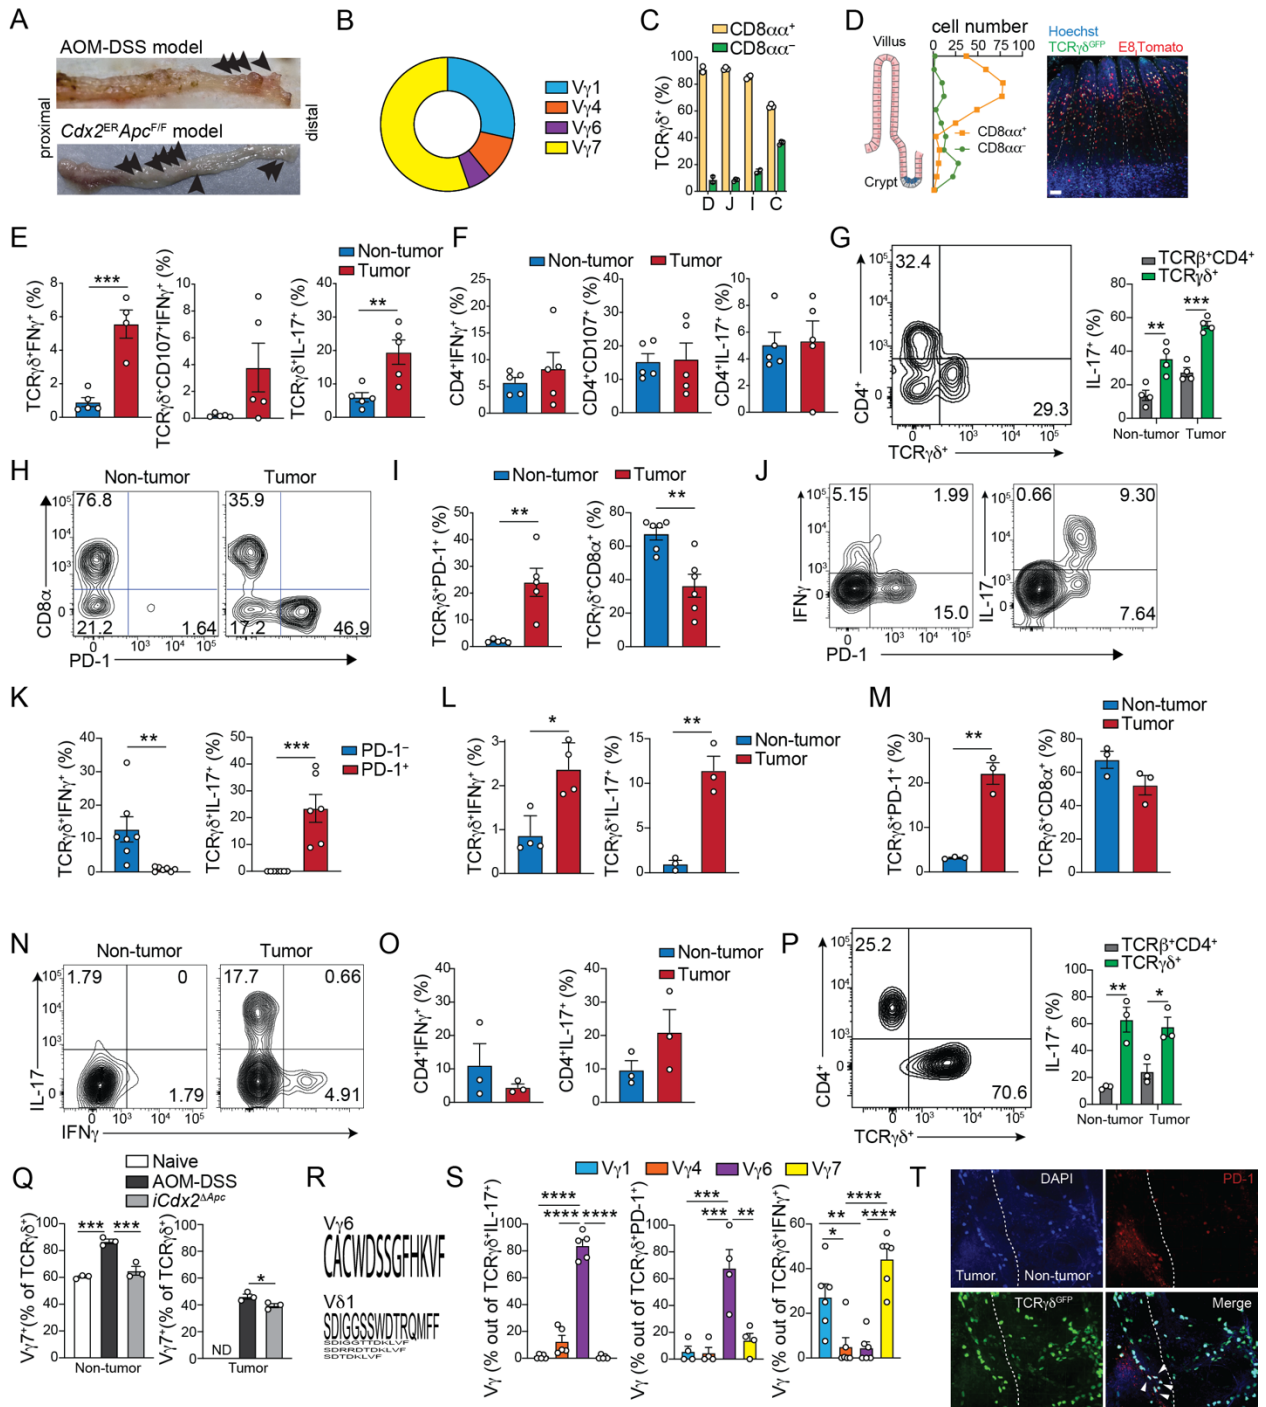

**Figure S2. Supporting data to Figure 2.** (A) Illustrative image of the colon of C57BL/6 mice injected with 12.5mg/kg of Azoxymethane (AOM) 2 days prior to three rounds of 1 week “on” and 2 weeks “off” of 2% Dextran sodium sulfate (DSS) in the drinking water (AOM-DSS model) (top) and tamoxifen-treated iCdx2<sup>AA<sup>PC</sup></sup> mice (bottom). Arrows indicate visible tumors (polyps). (B, C) Flow cytometry analysis of naïve C57BL/6 mice. (B) Frequency of V $\gamma$  usage by colonic  $\gamma\delta$  T cells. (C) Frequency of CD8 $\alpha\alpha^+$  and CD8 $\alpha\alpha^-$  among TCR $\gamma\delta^+$  cells from duodenum D, jejunum J, ileum I and colon C. (D) Whole-mount imaging of tissue-cleared ileum from E8I<sup>Tomato</sup>Trdc<sup>GFP</sup> double reporter mouse at steady-state. Image shows TCR $\gamma\delta^+$ CD8 $\alpha\alpha^+$  (Tomato<sup>+</sup>GFP<sup>+</sup>) and TCR $\gamma\delta^+$ CD8 $\alpha\alpha^-$  (Tomato<sup>-</sup>GFP<sup>+</sup>) cells along the villus-crypt axis. Scale bar= 40mm. (E-K, S) Flow cytometry analysis of  $\gamma\delta$  T cells from tumor or non-tumor colonic tissue of C57BL/6 mice subjected to AOM-DSS model. (E) Frequency of IFN- $\gamma^+$  (left), CD107<sup>+</sup> (center) and IL-17<sup>+</sup> (right) among TCR $\gamma\delta^+$  cells. (F) Frequency of IFN- $\gamma^+$  (left), CD107<sup>+</sup> (center) and IL-17<sup>+</sup> (right) among TCR $\alpha\beta^+$ CD4<sup>+</sup> cells. (G) Representative dot-plot (left) and frequency of CD4<sup>+</sup> and TCR $\gamma\delta^+$  cells among IL-17<sup>+</sup> cells. (H, I) Representative dot-plot and frequency of CD8 $\alpha^+$  and PD-1<sup>+</sup> among TCR $\gamma\delta^+$  cells. (J, K) Representative dot-plot and frequency of IFN- $\gamma^+$  and IL-17<sup>+</sup> among TCR $\gamma\delta^+$ PD-1<sup>+</sup> and TCR $\gamma\delta^+$ PD-1<sup>-</sup> cells. (L-P) Flow cytometry analysis of  $\gamma\delta$  T cells from tumor or non-tumor colonic tissue of tamoxifen-treated iCdx2<sup>AA<sup>PC</sup></sup> mice. (L) Frequency of IFN- $\gamma^+$  (left) and IL-17<sup>+</sup> (right) among TCR $\gamma\delta^+$  cells. (M) Frequency of PD-1<sup>+</sup> (left) and CD8 $\alpha^+$  (right) among TCR $\gamma\delta^+$  cells. (N) Representative plot of IFN- $\gamma$  and IL-17 expression by TCR $\gamma\delta^+$  cells. (O) Frequency of IFN- $\gamma^+$  (left) and IL-17<sup>+</sup> (right) among TCR $\alpha\beta^+$ CD4<sup>+</sup> cells from colonic tumor. (P) Representative dot-plot (left) and frequency (right) of CD4<sup>+</sup> and TCR $\gamma\delta^+$  cells among IL-17<sup>+</sup> cells. (Q) Frequency of V $\gamma$ 7<sup>+</sup> among TCR $\gamma\delta^+$  cells from naïve animals, animals subjected to AOM-DSS and tamoxifen treated iCdx2<sup>AA<sup>PC</sup></sup> mice. (R) Amino acid sequence used by V $\gamma$ 6V $\delta$ 1 expanded (Figure 2F). Font size represents frequency of usage. (S) Frequency of V $\gamma$ 1<sup>+</sup>, V $\gamma$ 4<sup>+</sup>, V $\gamma$ 6<sup>+</sup> and V $\gamma$ 7<sup>+</sup> among tumor-infiltrating  $\gamma\delta$  T cells expressing IL-17, PD-1 or IFN- $\gamma$ . (S) Immunofluorescence microscopy analysis of PD-1 expressing TCR $\gamma\delta^+$  cells on colonic tissue of iCdx2<sup>AA<sup>PC</sup></sup> Trdc<sup>GFP</sup> reporter mice 4 weeks after tamoxifen

administration. Arrows show GFP<sup>+</sup> PD-1<sup>+</sup> double labeled cells. For tissue labeling, samples were incubated with DAPI. (A-Q) Data representative from 2 experiments with 3-5 animals per group. (S) Data representative from 2 independent experiment. For cytokine staining, cells were stimulated with PMA and Ionomycin. \*P < 0.05, \*\*P < 0.01, \*\*\*P < 0.001, \*\*\*\*P < 0.0001. (E-G, I, K-M, O, P) two-tailed t-test; (Q, S) One-way ANOVA test with Dunnett's multiple comparison test. Error bars indicate SEM.

Figure S3

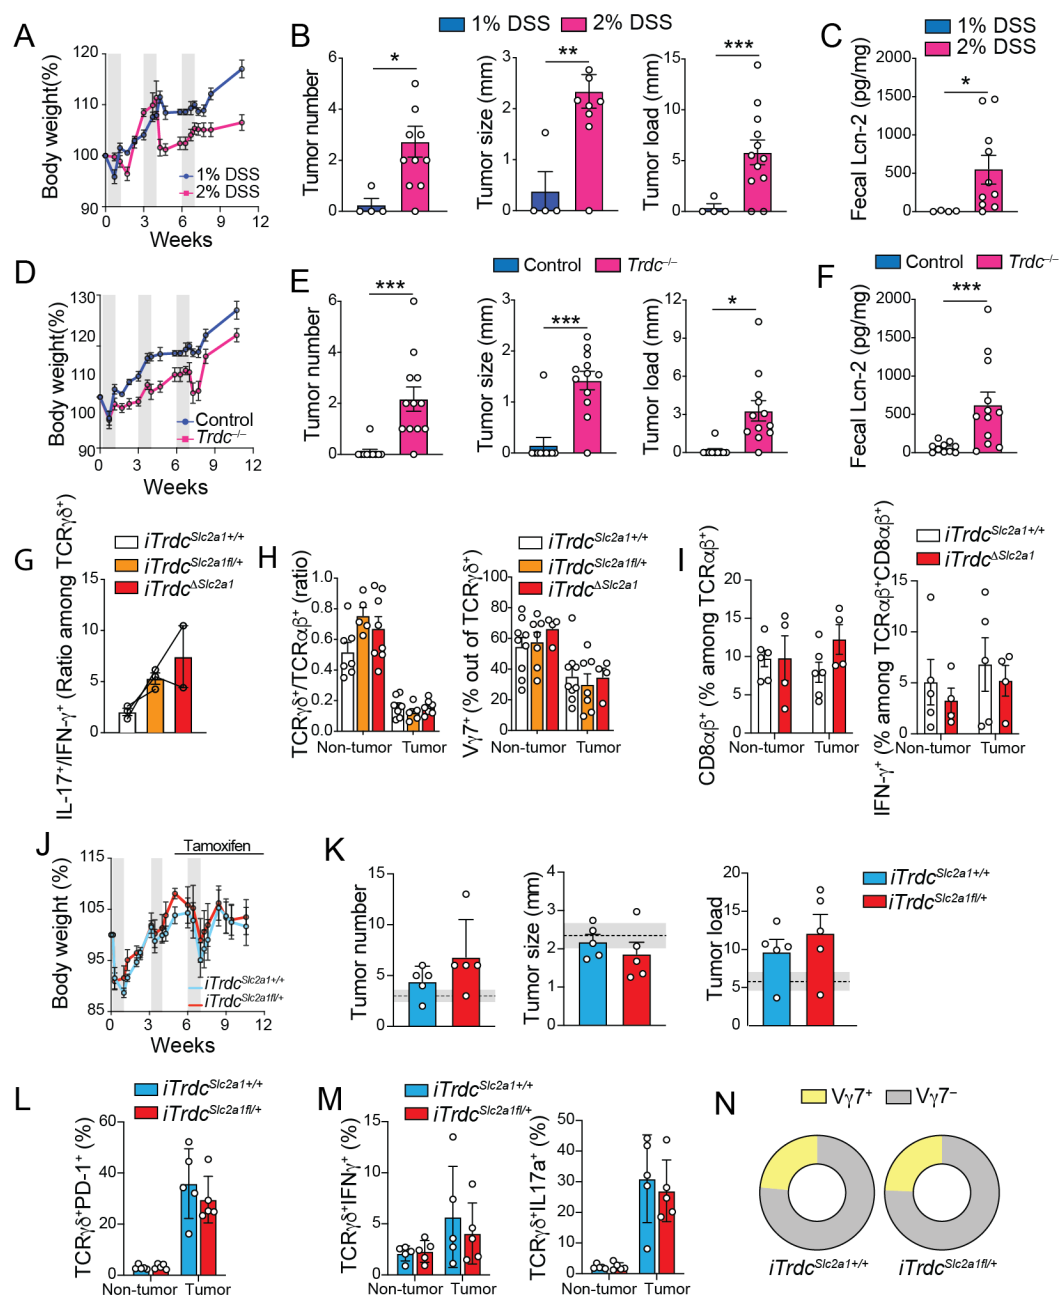



**Figure S3. Supporting data to Figure 3.** (A-C) C57BL/6 mice were injected with 12.5mg/kg of Azoxymethane (AOM) 2 days prior to three rounds of 1 week “on” and 2 weeks “off” of 1% vs 2% Dextran sodium sulfate (DSS) in the drinking water. (A) Mean percentage of body weight changes during AOM-DSS treatment. Gray bars represent DSS treatment. (B) Tumor number, size, and load. (C) Fecal lipocalin-2 quantification. (D-F)  $Trdc^{-/-}$  and C57BL/6 control mice were subjected to AOM-DSS model. (D) Mean percentage of body weight changes during AOM-DSS treatment. Gray bars represent DSS treatment. (E) Tumor number, size, and load. Shaded area bounded by dashed lines indicates mean  $\pm$  SEM of all control C57BL6/J mice analyzed in fig. S3B. (F) Fecal lipocalin-2 quantification. (G-N)  $iTrdc^{\Delta Slc2a1}$ ,  $iTrdc^{Slc2a1fl/+}$  and  $iTrdc^{Slc2a1+/+}$  littermate control mice were subjected to AOM-DSS model, treated with tamoxifen for the first 3 weeks (G-I) or the last 6 weeks (J-N) and analyzed 12 weeks after initial AOM injection. (G-I; L-N) Flow cytometry analysis of colonic  $\gamma\delta$  T cells. (G) Ratio of IL-17<sup>+</sup> to IFN- $\gamma$ <sup>+</sup> cells among tumor infiltrating TCR $\gamma\delta$ <sup>+</sup> cells. (H) TCR $\gamma\delta$ <sup>+</sup>/TCR $\alpha\beta$ <sup>+</sup> ratio among CD45<sup>+</sup> cells (right) and frequency of V $\gamma$ 7<sup>+</sup> among TCR  $\gamma\delta$ <sup>+</sup> cells. (I) Frequency of CD8 $\alpha\beta$ <sup>+</sup> T cells among TCR $\alpha\beta$ <sup>+</sup> cells (left) and IFN- $\gamma$ <sup>+</sup> among TCR $\alpha\beta$ <sup>+</sup>CD8 $\alpha\beta$ <sup>+</sup> cells (right). (J) Mean percentage of body weight changes during AOM-DSS treatment. Gray bars represent DSS treatment. (K) Tumor number, size, and load. Shaded area bounded by dashed lines indicates mean  $\pm$  SEM of all control C57BL6/J mice analyzed in fig. S3B (AOM+DSS model). (L) Frequency of PD-1<sup>+</sup> cells among TCR $\gamma\delta$ <sup>+</sup> cells. (M) Frequency of IFN- $\gamma$ <sup>+</sup> (left) and IL-17<sup>+</sup> (right) among TCR $\gamma\delta$ <sup>+</sup> cells. (N) Frequency of V $\gamma$  usage by tumor infiltrating TCR $\gamma\delta$ <sup>+</sup> cells. 1% vs 2% DSS data pooled from 2 experiments with 2-5 animals per group.  $Trdc^{-/-}$  data pooled from 3 experiments with 3-5 animals per group.  $iTrdc^{\Delta Slc2a1}$  representative data from 3 (early) and 2 (late) experiments with 3-5 animals per group. For cytokine staining, cells were stimulated with PMA and Ionomycin. \*P < 0.05, \*\*P < 0.01, \*\*\*P < 0.001. (G-I, L-N) One-way ANOVA test with Dunnett’s multiple comparison test; (B, C, E, F, K) Two-tailed t-test; Error bars indicate SEM.

Figure S4

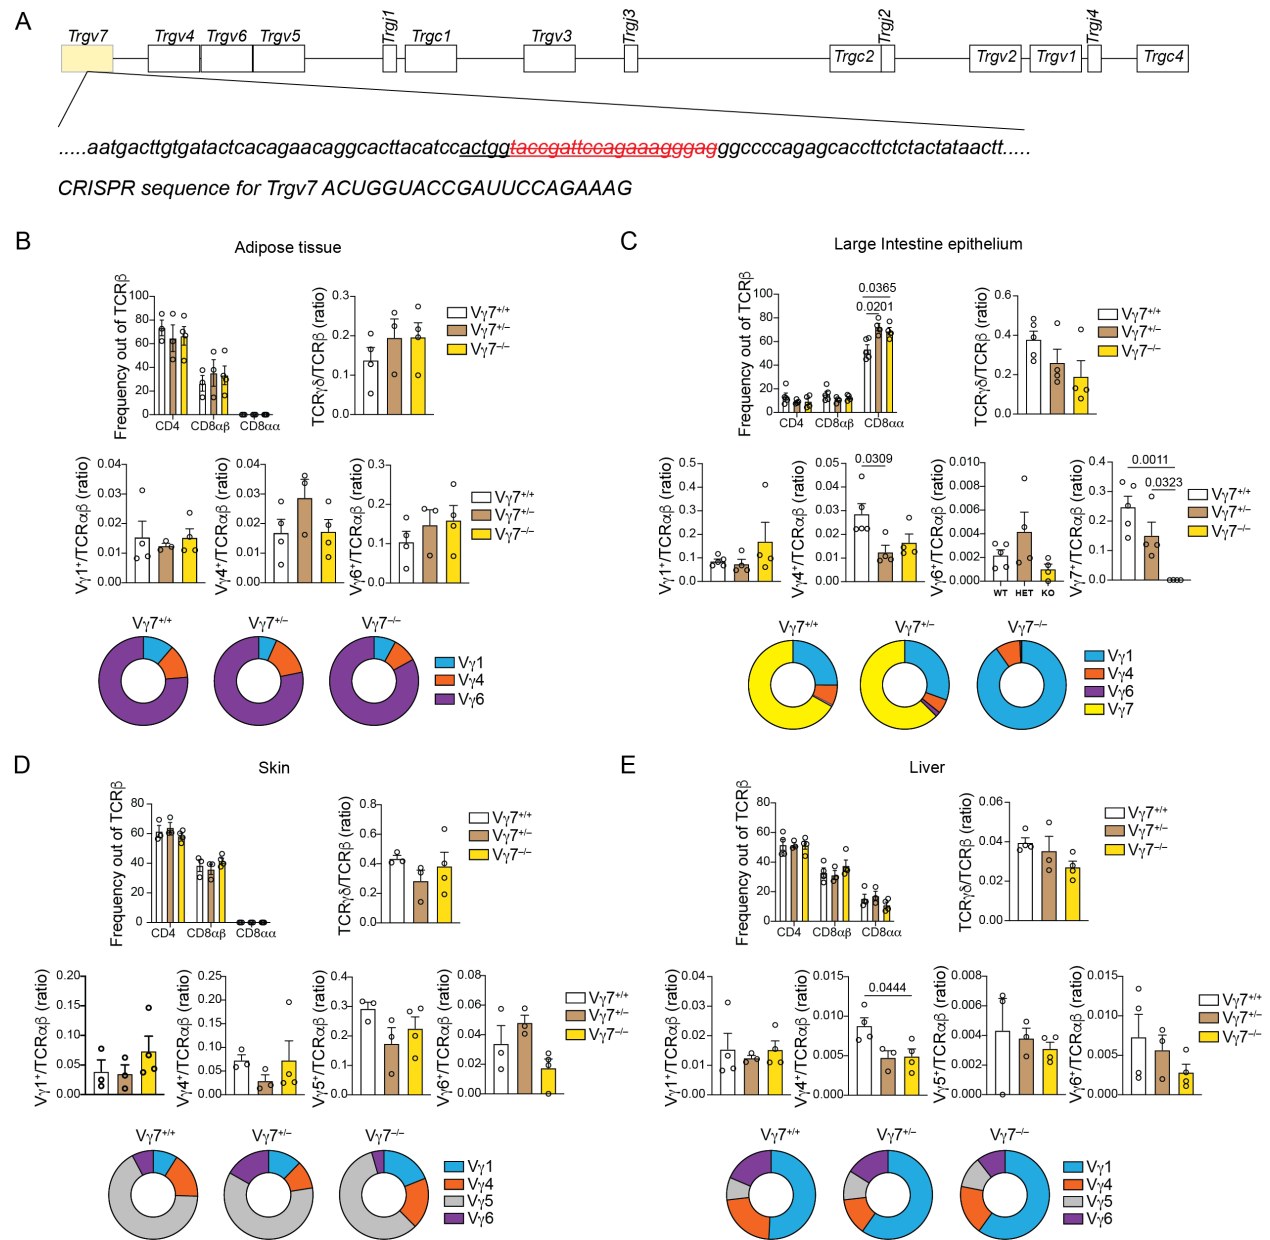

**Figure S4. Supporting data to Figure 3.** Characterization of  $V\gamma 7^{-/-}$  mouse strain. (A) Generation of  $V\gamma 7$  knockout mice by CRISPR deletion target. Schematic view of TCR gamma locus and CRISPR sequence used to partially delete *Trgv7* gene. Targeted sequence is shown underlined and deleted sequence is shown in red and strikethrough. (B-E) Flow cytometry analysis of  $\alpha\beta^+$  and  $\gamma\delta^+$  T cells from (B) adipose tissue, (C) large intestine epithelium (D) lung, and (E) liver tissue. Frequency of  $CD4^+$ ,  $CD8\alpha\beta^+$  and  $C8\alpha\alpha^+$  among  $TCR\alpha\beta^+$  cells, and ratio of  $TCR\gamma\delta/\alpha\beta$  (top) and indicated  $V\gamma/TCR\alpha\beta$  among  $CD45^+$  cells (center). Pie chart of frequency of  $V\gamma$  usage among  $TCR\gamma\delta^+$  cells (bottom) from  $V\gamma 7^{-/-}$ ,  $V\gamma 7^{+/-}$  and  $V\gamma 7^{+/+}$  littermate mice.  $V\gamma 7^{-/-}$  strain was backcrossed to C57BL/6 for at least 10 generations. Data pooled from 2 experiments with 3 animals per group. \* $P < 0.05$ , \*\* $P < 0.01$ , \*\*\* $P < 0.001$ . (B-E) One-way ANOVA test with Dunnett's multiple comparison test. Error bars indicate SEM.

Figure S5

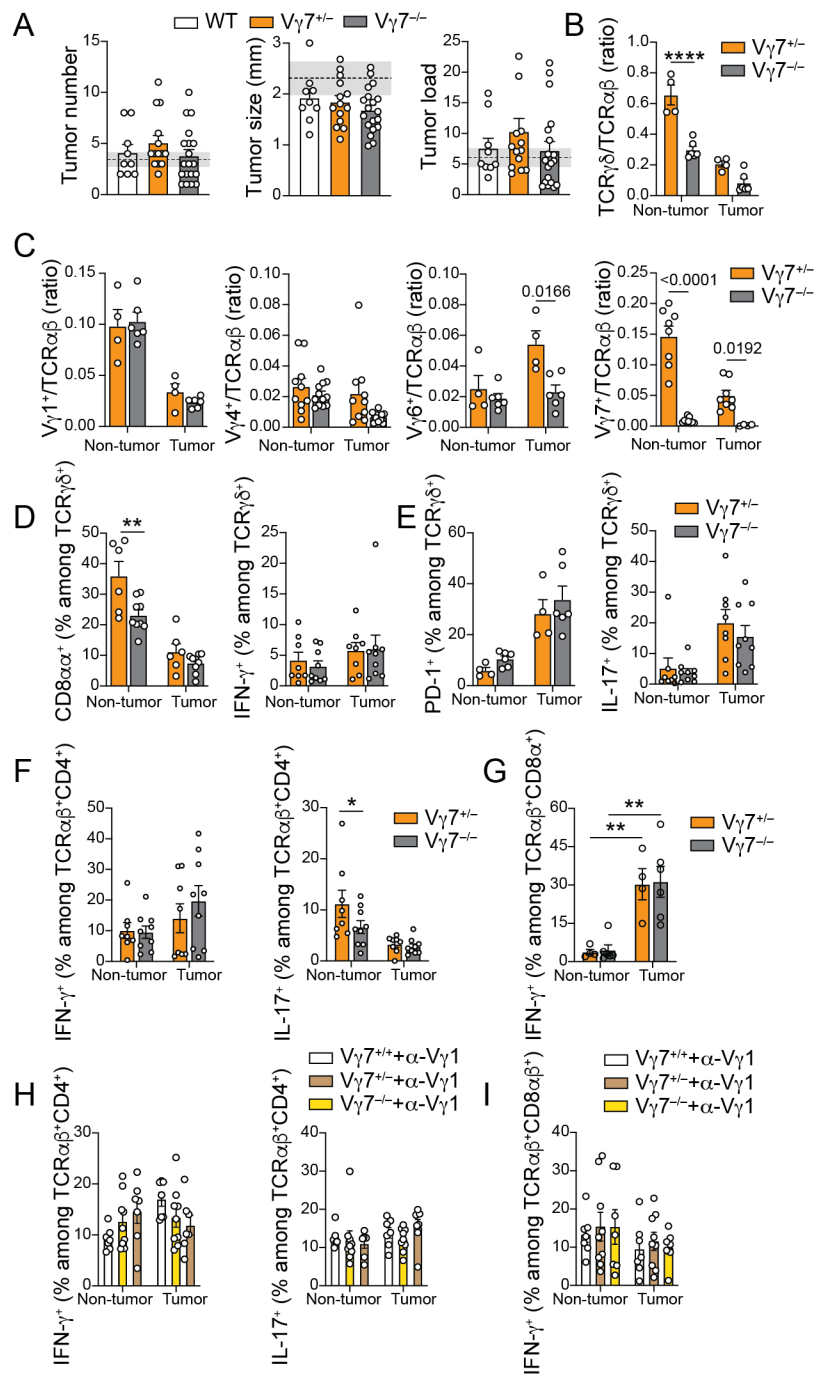

**Figure S5. Supporting data to Figure 3.** (A-I)  $V\gamma 7^{-/-}$ ,  $V\gamma 7^{+/-}$  and  $V\gamma 7^{+/+}$  littermate control mice were subjected to AOM-DSS model. (H, I) All groups were treated twice a week with 200 $\mu$ g of anti- $V\gamma 1$  depleting antibody (2.11) 1 weeks prior AOM injection until the 2nd DSS treatment. (A) Tumor number, size, and load. Shaded area bounded by dashed lines indicates mean  $\pm$  SEM of all control C57BL6/J mice analyzed in fig. S3B. (B-I) Flow cytometry analysis of  $\gamma\delta$  T cells from tumor or non-tumor colonic tissue. (B) TCR $\gamma\delta/\alpha\beta$  ratio within CD45 $^{+}$  cells. (C) Ratio of  $V\gamma 1^{+}$ ,  $V\gamma 4^{+}$ ,  $V\gamma 6^{+}$  and  $V\gamma 7^{+}$  cells to TCR $\alpha\beta^{+}$  cells. (D) Frequency of CD8 $\alpha\alpha^{+}$  (left) and IFN- $\gamma^{+}$  (right) among TCR $\gamma\delta^{+}$  cells. (E) Frequency of PD-1 $^{+}$  (left) and IL-17 $^{+}$  (right) among TCR $\gamma\delta^{+}$  cells. (F, H) Frequency of IFN- $\gamma^{+}$  (left) and IL-17 $^{+}$  (right) among TCR $\alpha\beta^{+}$ CD4 $^{+}$  cells. (G, I) Frequency of IFN- $\gamma^{+}$  among TCR $\alpha\beta^{+}$ CD8 $\alpha\beta^{+}$  cells.  $V\gamma 7^{-/-}$  data pooled from 3 (A-G) and 2 (H, I) experiments with 3-5 animals per group. For cytokine staining, cells were stimulated with PMA and Ionomycin. \*P < 0.05, \*\*P < 0.01, \*\*\*P < 0.001. (A-I) One-way ANOVA test with Dunnett's multiple comparison test; Error bars indicate SEM.

Figure S6

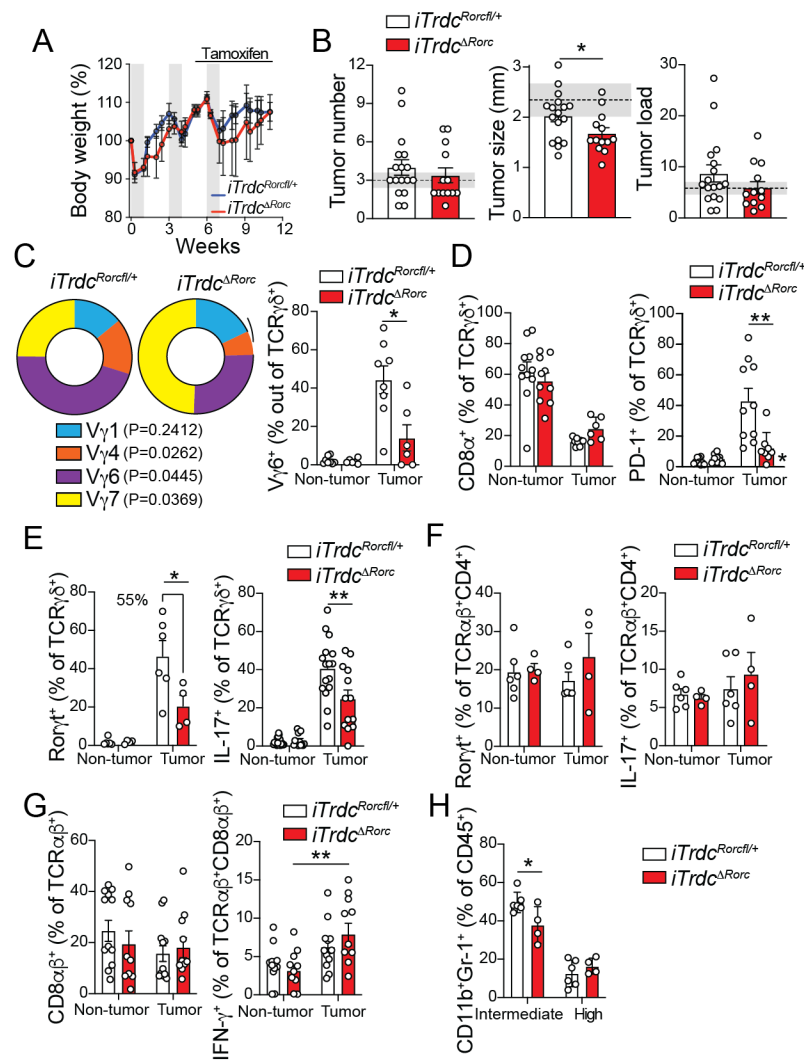

**Figure S6. Supporting data to Figure 4.** (A-H)  $iTrdc^{\Delta Rorc}$  and  $iTrdc^{Rorcfl/+}$  littermate control mice were subjected to AOM-DSS model, treated with tamoxifen for the last 6 weeks of the experiment and analyzed 12 weeks after initial AOM injection. (A) Mean percentage of body weight changes during AOM-DSS treatment. Gray bars represent DSS treatment. (B) Tumor number, size, and load. Shaded area bounded by dashed lines indicates mean  $\pm$  SEM of all control C57BL6/J mice analyzed in fig. S3B (AOM+DSS model). (C-H) Flow cytometry analysis of  $\gamma\delta$  T cells from tumor and non-tumor colonic tissue. (C) Frequency of  $V\gamma$  usage (pie chart) and frequency of  $V\gamma 6^+$  among  $TCR\gamma\delta^+$  cells isolated from tumor. (D) Frequency of  $CD8\alpha^+$  (left) and  $PD-1^+$  (right), and (E)  $Ror\gamma^+$  (left) and  $IL-17^+$  (right) cells among  $TCR\gamma\delta^+$  cells. (F) Frequency of  $Ror\gamma^+$  (left) and  $IL-17^+$  (right) among  $TCR\alpha\beta^+CD4^+$  cells. (G) Frequency of  $CD8\alpha\beta^+$  among  $TCR\alpha\beta^+$  cells (left) and  $IFN-\gamma^+$  among  $TCR\alpha\beta^+CD8\alpha\beta^+$  cells (right). (H) Frequency of tumor infiltrating  $CD11b^+Gr-1^{int}$  and  $CD11b^+Gr-1^{high}$  among  $CD45^+$  cells. Data from  $iTrdc^{\Delta Rorc}$  are pooled from 3 independent experiments with 3-6 animals per group. Experimental and control mice were co-housed. (C-H) One-way ANOVA with Dunnett's multiple comparison test; (B, C) two-tailed t-test. For cytokine staining, cells were stimulated with PMA and Ionomycin. \*  $p < 0.05$ , \*\*  $p < 0.01$ , \*\*\*  $p < 0.001$ . Error bars indicate SEM.

Figure S7

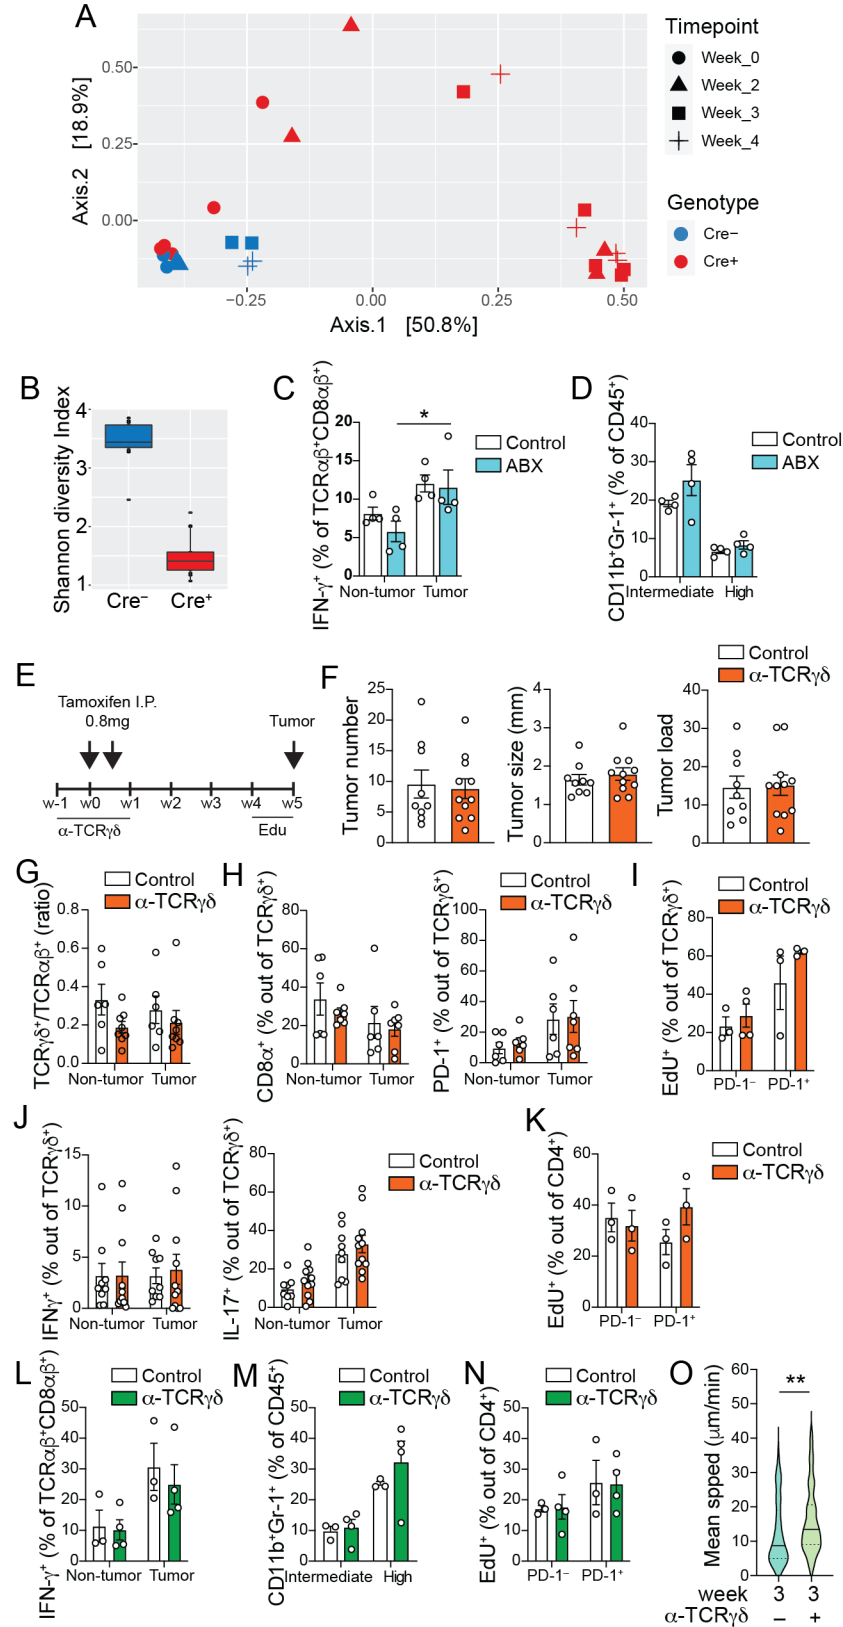



**Figure S7. Supporting data to Figure 4.** (A, B) Bacterial 16S ribosomal RNA amplicon (16S rRNA) sequencing from fecal pellets of tamoxifen-treated iCdx2<sup>ΔAPC</sup> and APC<sup>fl/fl</sup> littermate control mice. (A) Bi-dimensional principal coordinate analysis plot from iCdx2<sup>ΔAPC</sup> (Cre+ red) and APC<sup>fl/fl</sup> control mice (Cre- blue) before (week 0), and 2, 3 and 4 weeks after tamoxifen administration. (B) Shannon alpha diversity plot from iCdx2<sup>ΔAPC</sup> (Cre+ red) and APC<sup>fl/fl</sup> control mice (Cre- blue), four weeks after tamoxifen administration. (C-O) iCdx2<sup>ΔAPC</sup> mice were treated with 2 i.p. injections of 0.8mg tamoxifen and analyzed 5 weeks after. (C, D) Mice were treated with broad spectrum antibiotic (ABX) in the drinking water for the last 2 week of the experiment. (C) Frequency of IFN- $\gamma$ <sup>+</sup> among TCR $\alpha\beta$ <sup>+</sup>CD8 $\alpha\beta$ <sup>+</sup> cells. (D) Frequency of tumor infiltrating CD11b<sup>+</sup>Gr-1<sup>Int</sup> and CD11b<sup>+</sup>Gr-1<sup>high</sup> among CD45<sup>+</sup> cells. (E-K) Mice were treated with 400 $\mu$ g of anti-TCR $\gamma\delta$  blocking antibody (UC7-13D5) twice a week starting 1 week before until 1 week after the first tamoxifen injection, and EdU in the drinking water for the last week of the experiment. (E) Protocol. (F) Tumor number, size, and load. (G-K) Flow cytometry analysis of  $\gamma\delta$  T cells from tumor or non-tumor colonic tissue. (G) TCR $\gamma\delta/\alpha\beta$  ratio within CD45<sup>+</sup> cells. (H) Frequency of CD8 $\alpha$ <sup>+</sup> (left) and PD-1<sup>+</sup> (right) among TCR $\gamma\delta$ <sup>+</sup> cells. (I) Frequency of EdU incorporation by PD-1<sup>-</sup> or PD-1<sup>+</sup> among TCR $\gamma\delta$ <sup>+</sup> cells. (J) Frequency of IFN- $\gamma$ <sup>+</sup> (left) and IL-17<sup>+</sup> (right) among TCR $\gamma\delta$ <sup>+</sup> cells. (K) Frequency of EdU incorporation by PD-1<sup>-</sup> or PD-1<sup>+</sup> among TCR $\alpha\beta$ <sup>+</sup>CD4<sup>+</sup> cells. (L-N) Mice were treated with 400 $\mu$ g of anti-TCR $\gamma\delta$  blocking antibody (UC7-13D5) twice a week for the last 2 weeks of the experiment, and EdU in the drinking water for the last week of the experiment. (L) Frequency of IFN- $\gamma$ <sup>+</sup> among TCR $\alpha\beta$ <sup>+</sup>CD8 $\alpha\beta$ <sup>+</sup> cells. (M) Frequency of tumor infiltrating CD11b<sup>+</sup>Gr-1<sup>Int</sup> and CD11b<sup>+</sup>Gr-1<sup>high</sup> among CD45<sup>+</sup> cells. (N) Frequency of EdU incorporation by PD-1<sup>-</sup> or PD-1<sup>+</sup> among TCR $\alpha\beta$ <sup>+</sup>CD4<sup>+</sup> cells. (O) Intravital imaging of cecum  $\gamma\delta$ <sup>GFP</sup> cells 3 weeks after tamoxifen injection. Mice were treated with 400 $\mu$ g of anti-TCR $\gamma\delta$  blocking antibody (UC7-13D5) twice a week for the last week of the experiment. Cells were tracked by *Imaris* (Bitplane AG) software. Graph shows mean speed of tracks. Data from iCdx2<sup>ΔAPC</sup> antibiotic treated (ABX) are pooled from 3 experiments with 3-4 animals per group. 16S rRNA sequencing data representative of 2 experiments with 2-4 animals per group. Data from iCdx2<sup>ΔAPC</sup> antibody treated (UC7-13D5) are pooled from 2

experiments with 3-4 mice per group. Experimental and control mice were co-housed. (C, G-N) One-way ANOVA with Dunnett's multiple comparison test; (D, F) two-tailed t-test. For cytokine staining, cells were stimulated with PMA and Ionomycin. \*  $p < 0.05$ , \*\*  $p < 0.01$ , \*\*\*  $p < 0.001$ . Error bars indicate SEM.

Figure S8

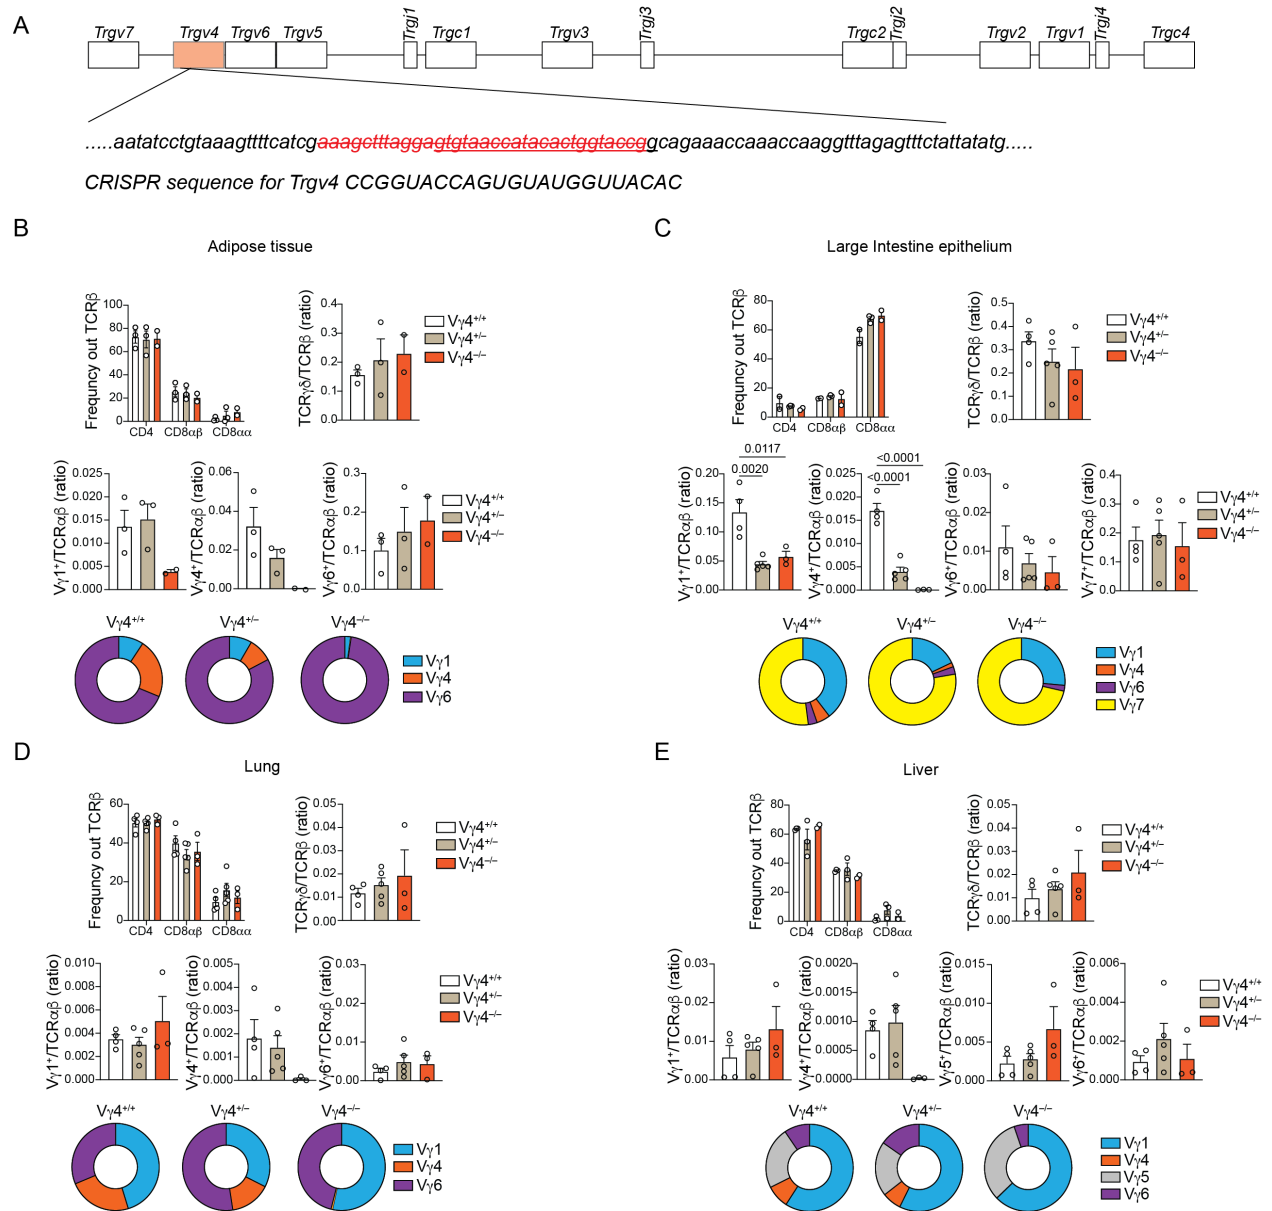

**Figure S8. Supporting data to Figure 5.** Characterization of  $V\gamma 4^{-/-}$  mouse strain. (A) Generation of  $V\gamma 4$  knockout mice by CRISPR deletion target. Schematic view of TCR gamma locus and CRISPR sequence used to partially delete *Trgv4* gene. Targeted sequence is shown underlined and deleted sequence is shown in red and strikethrough. (B-E) Flow cytometry analysis of  $\alpha\beta^{+}$  and  $\gamma\delta^{+}$  T cells from (B) adipose tissue, (C) large intestine epithelium (D) lung, and (E) liver. Frequency of  $CD4^{+}$ ,  $CD8\alpha\beta^{+}$  and  $C8\alpha\alpha^{+}$  among  $TCR\alpha\beta^{+}$  cells, and ratio of  $TCR\gamma\delta/\alpha\beta$  (top) and indicated  $V\gamma/TCR\alpha\beta$  among  $CD45^{+}$  cells (center). Pie chart of frequency of  $V\gamma$  usage among  $TCR\gamma\delta^{+}$  cells (bottom) from  $V\gamma 4^{-/-}$ ,  $V\gamma 4^{+/-}$  and  $V\gamma 4^{+/+}$  littermate mice.  $V\gamma 4^{-/-}$  strain was backcrossed to C57BL/6 mice for at least 10 generations. Data pooled from 2 experiments with 3 mice per group. \* $P < 0.05$ , \*\* $P < 0.01$ , \*\*\* $P < 0.001$ . (B-E) One-way ANOVA test with Dunnett's multiple comparison test. Error bars indicate SEM.

Figure S9

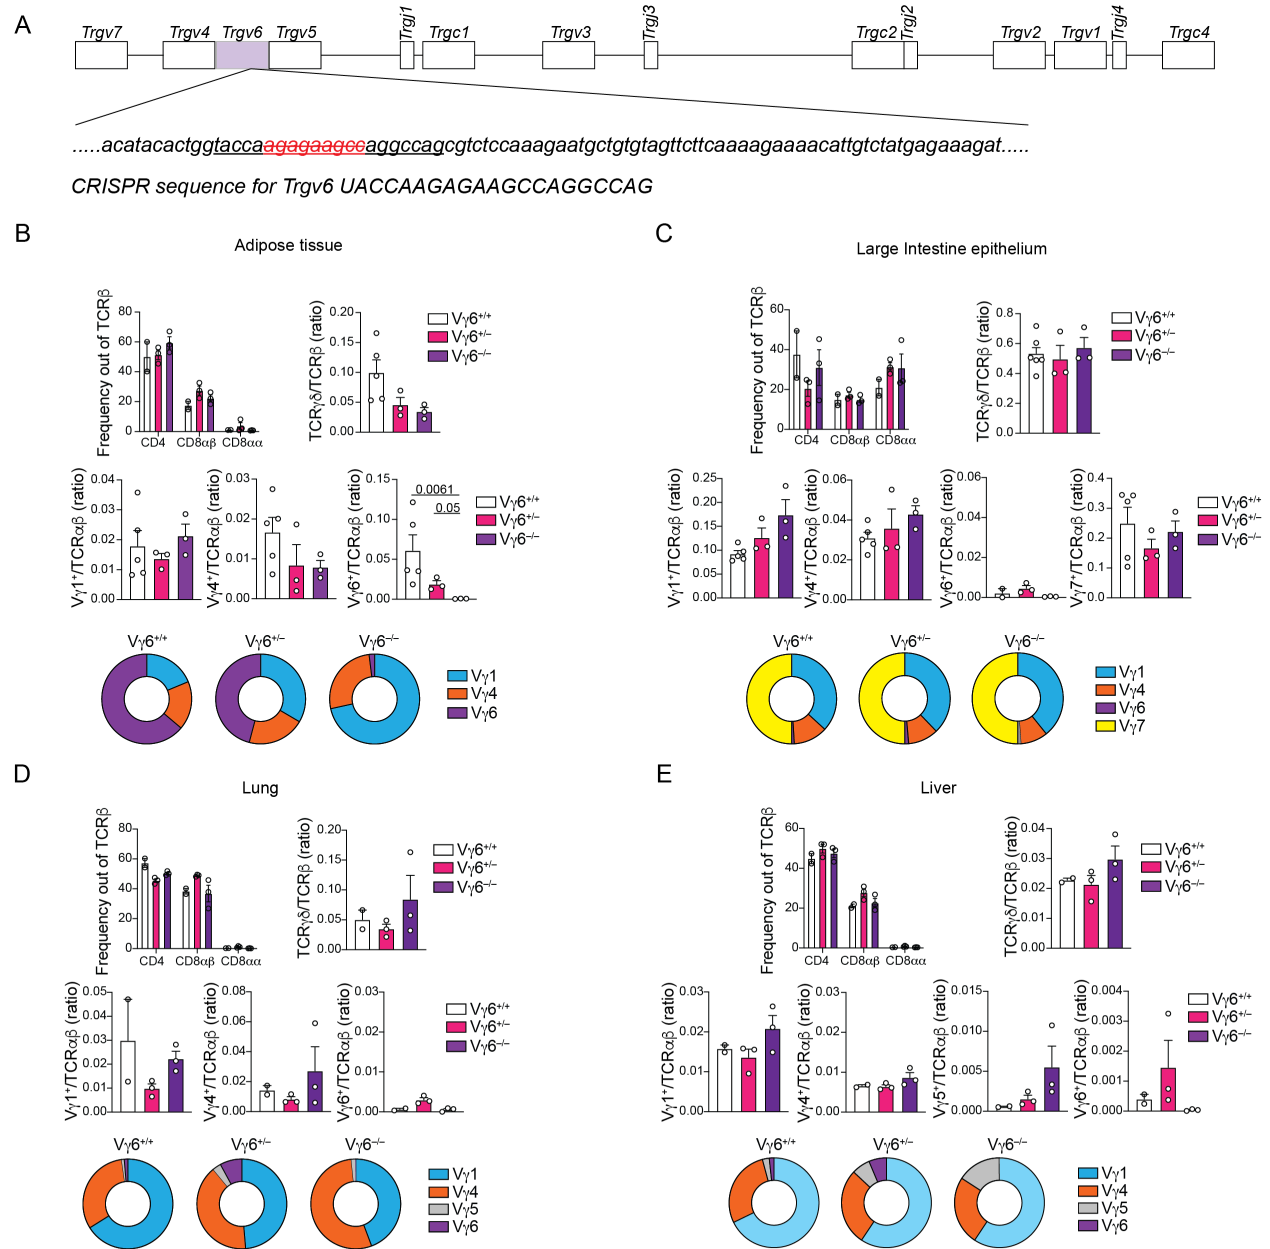

**Figure S9. Supporting data to Figure 5.** Characterization of  $V\gamma 6^{-/-}$  mouse strain. (A) Generation of  $V\gamma 6$  knockout mice by CRISPR deletion target. Schematic view of TCR gamma locus and CRISPR sequence used to partially delete *Trgv6* gene. Targeted sequence is shown underlined and deleted sequence is shown in red and strikethrough. (B-E) Flow cytometry analysis of  $\alpha\beta^+$  and  $\gamma\delta^+$  T cells from (B) adipose tissue, (C) large intestine epithelium (D) lung, and (E) liver. Frequency of  $CD4^+$ ,  $CD8\alpha\beta^+$  and  $C8\alpha\alpha^+$  among  $TCR\alpha\beta^+$  cells, and ratio of  $TCR\gamma\delta/\alpha\beta$  (top) and indicated  $V\gamma/TCR\alpha\beta$  among  $CD45^+$  cells (center). Pie chart of frequency of  $V\gamma$  usage among  $TCR\gamma\delta^+$  cells (bottom) from  $V\gamma 6^{-/-}$ ,  $V\gamma 6^{+/-}$  and  $V\gamma 6^{+/+}$  littermate mice.  $V\gamma 6^{-/-}$  strain was backcrossed to C57BL/6 for at least 10 generations. Data pooled from 2 experiments with 3 mice per group. \* $P < 0.05$ , \*\* $P < 0.01$ , \*\*\* $P < 0.001$ . (B-E) One-way ANOVA test with Dunnett's multiple comparison test. Error bars indicate SEM.

Figure S10

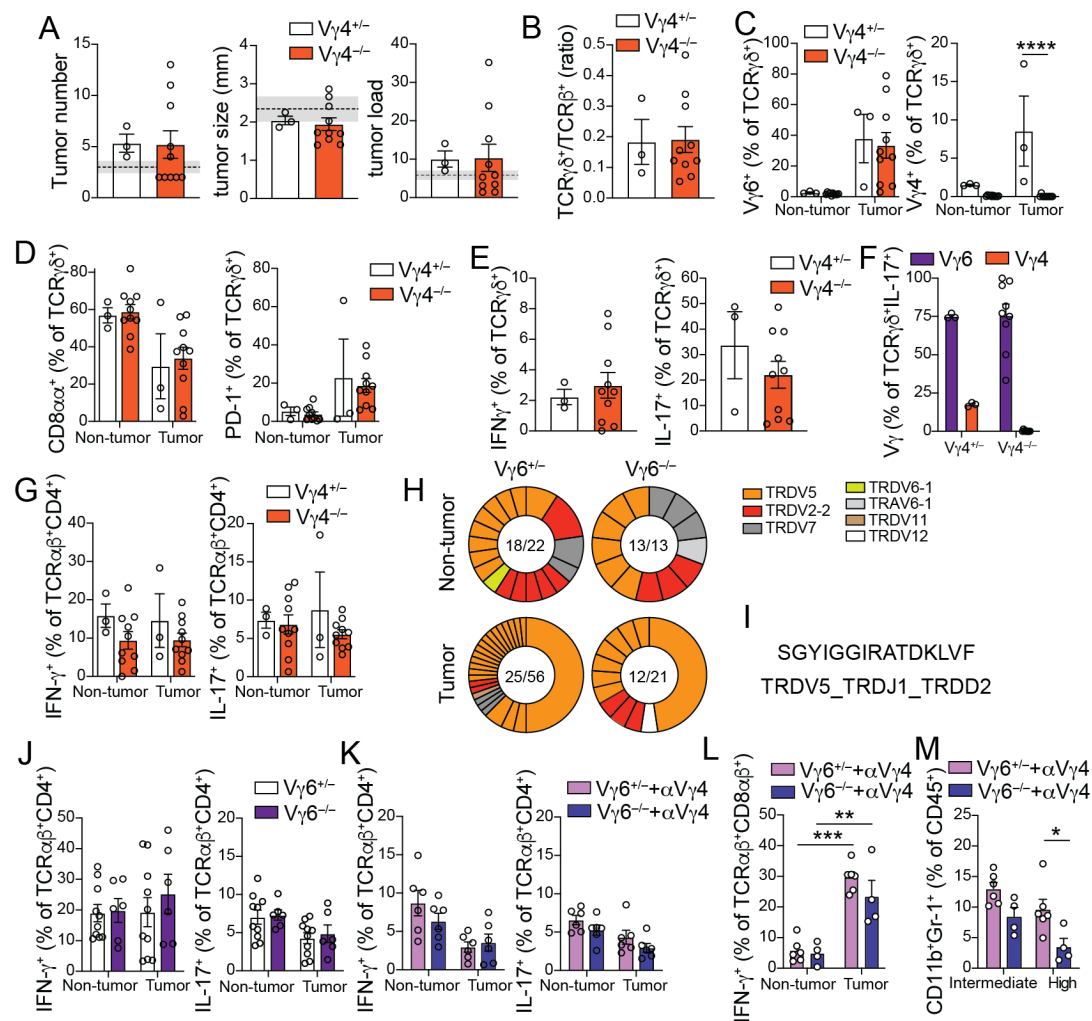

**Figure S10. Supporting data to Figure 5.** (A-G) Female  $V\gamma 4^{-/-}$  and  $V\gamma 4^{+/-}$  littermate control mice, (H-M)  $V\gamma 6^{-/-}$  and  $V\gamma 6^{+/-}$  littermate control mice were subjected to the AOM-DSS model and analyzed 12 weeks after initial AOM injection. In panels L to M, mice received injections of 200 $\mu$ g of anti- $V\gamma 4$  depleting antibody (UC3-10A6) twice a week starting one week after the 2nd DSS cycle (last six weeks of experiment). (A) Tumor number, size, and load. Shaded area bounded by dashed lines indicates mean  $\pm$  SEM of all control C57BL6/J mice analyzed in fig. S3B (AOM+DSS model). (B-G) Flow cytometry analysis of  $\gamma\delta$  T cells from tumor or non-tumor colonic tissue. (B) TCR $\gamma\delta/\alpha\beta$  ratio within CD45 $^{+}$  cells from tumor colonic tissue. (C) Frequency of  $V\gamma 6^{+}$  (left) and  $V\gamma 4^{+}$  (right), and (D) CD8 $\alpha^{+}$  (left) and PD-1 $^{+}$  (right) among TCR $\gamma\delta^{+}$  cells. (E) Frequency of IFN- $\gamma^{+}$  (left) and IL-17 $^{+}$  (right) among TCR $\gamma\delta^{+}$  cells from tumor colonic tissue. (F) Frequency of  $V\gamma 6^{+}$  and  $V\gamma 4^{+}$  among IL-17-producing  $\gamma\delta$  T cells in tumor colonic tissue. (G) Frequency of IFN- $\gamma^{+}$  (left) and IL-17 $^{+}$  (right) among TCR $\alpha\beta^{+}$ CD4 $^{+}$  cells. (H) Single-cell TCR sequencing of  $V\gamma 4^{+}$  cells (CD45 $^{+}$ TCR $\alpha\beta^{-}$ TCR $\gamma\delta^{+}$ ) from tumor and non-tumor colonic tissue. Clones are colored based on V $\delta$  usage. Orange clones represent expanded  $V\gamma 4V\delta 5$  cells. (I) Amino acid sequence of V $\delta 5$  chain from expanded  $V\gamma 4V\delta 5$  clone. (J, K) Frequency of IFN- $\gamma^{+}$  (left) and IL-17 $^{+}$  (right) among TCR $\alpha\beta^{+}$ CD4 $^{+}$  cells. (L) Frequency of IFN- $\gamma^{+}$  among TCR $\alpha\beta^{+}$ CD8 $\alpha\beta^{+}$  cells. (K) Frequency of tumor infiltrating CD11b $^{+}$ Gr-1 $^{Int}$  and CD11b $^{+}$ Gr-1 $^{High}$  among CD45 $^{+}$  cells.  $V\gamma 4^{-/-}$  data pooled from 2 experiments with 3-5 mice per group. For cytokine staining, cells were stimulated with PMA and Ionomycin. \*P < 0.05, \*\*P < 0.01, \*\*\*P < 0.001, \*\*\*\*P < 0.0001. (C, D, F, G, J-M) One-way ANOVA test with Dunnett's multiple comparison test; (A, B, E) two-tailed t-test. Error bars indicate SEM.
